# Supplementary figures and images for: Electroleaching and electrodeposition of silver in ethaline 1 : 2 and propeline 1 : 3: transport properties and electrode phenomena
Source: Royal Society of Chemistry journal article supplement (doi:10.1039/d4va00042k), 2024-01-01

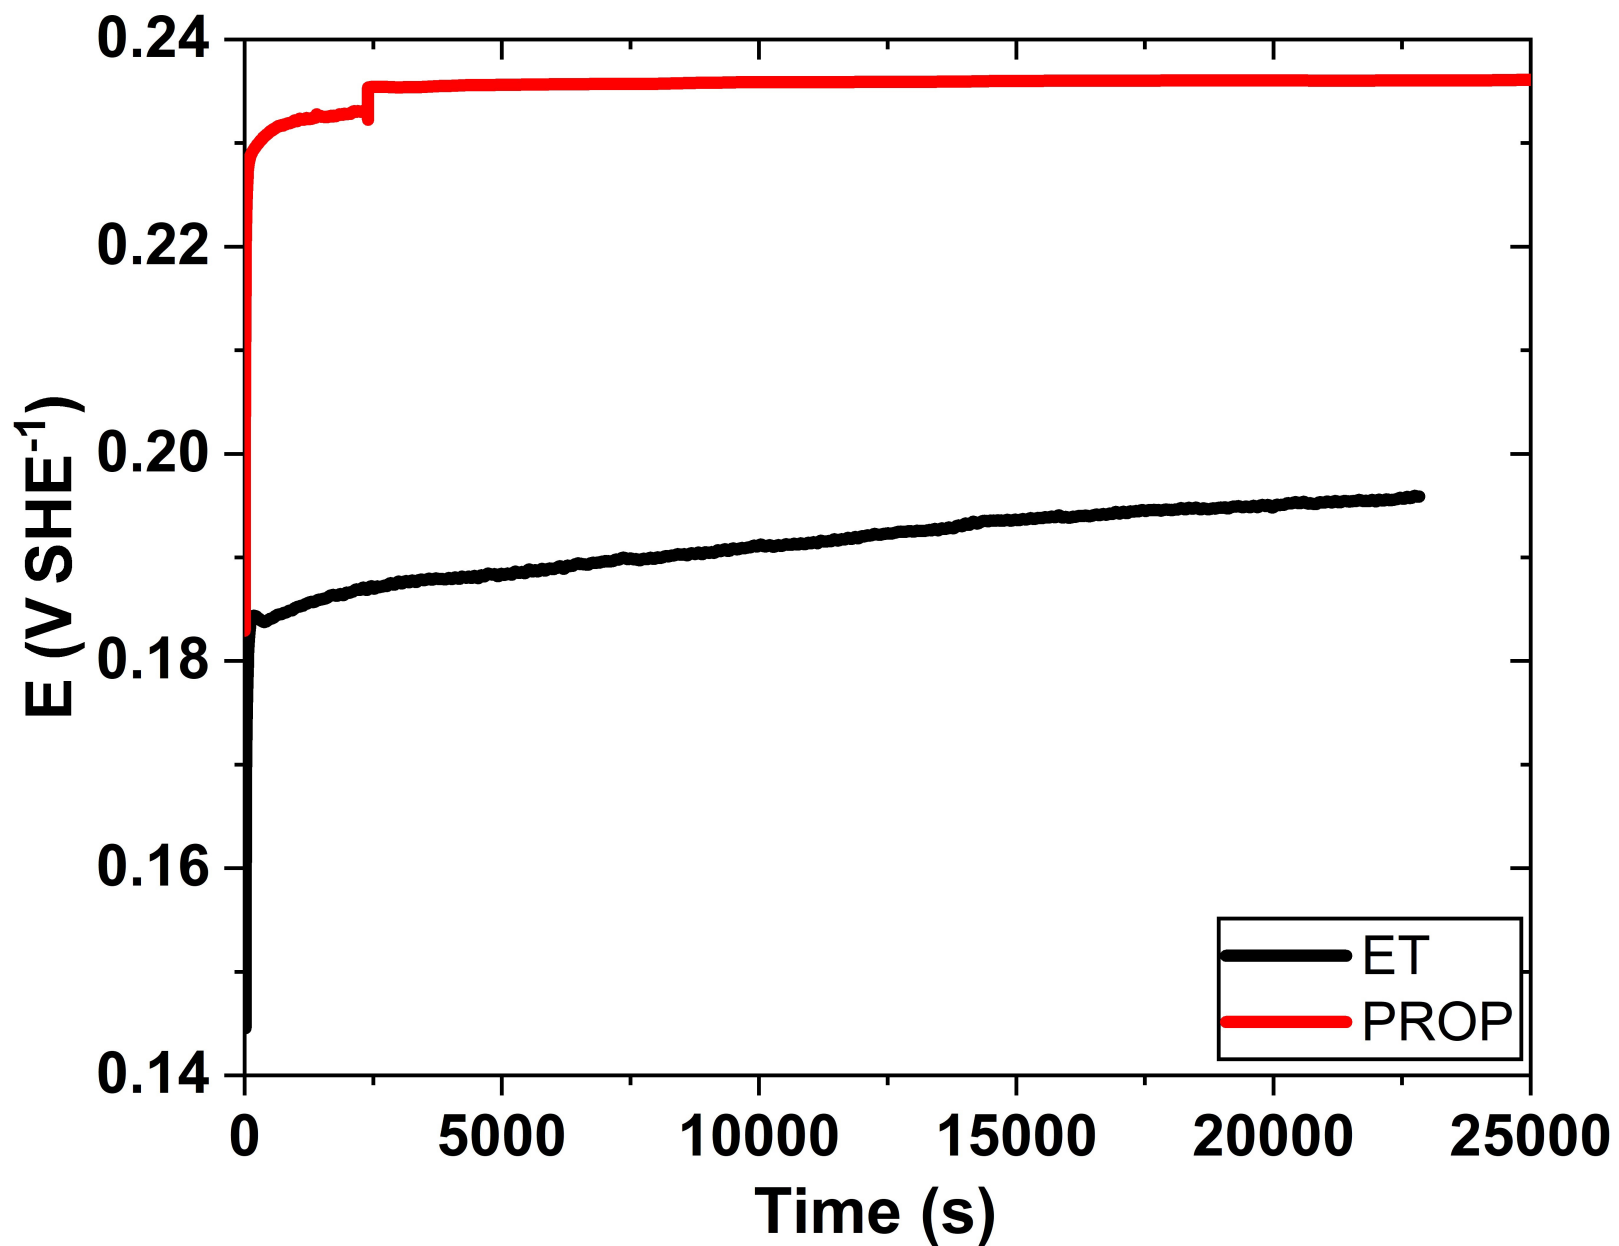

Supplement: d4va00042k1.pdf [file d4va00042k1.pdf]

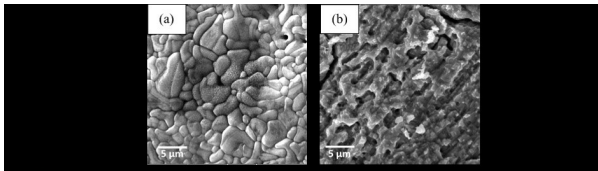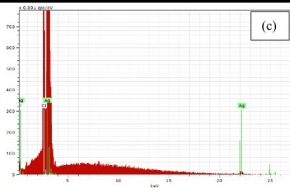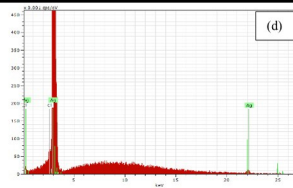

Supplement: d4va00042k2.pdf [file d4va00042k2.pdf]

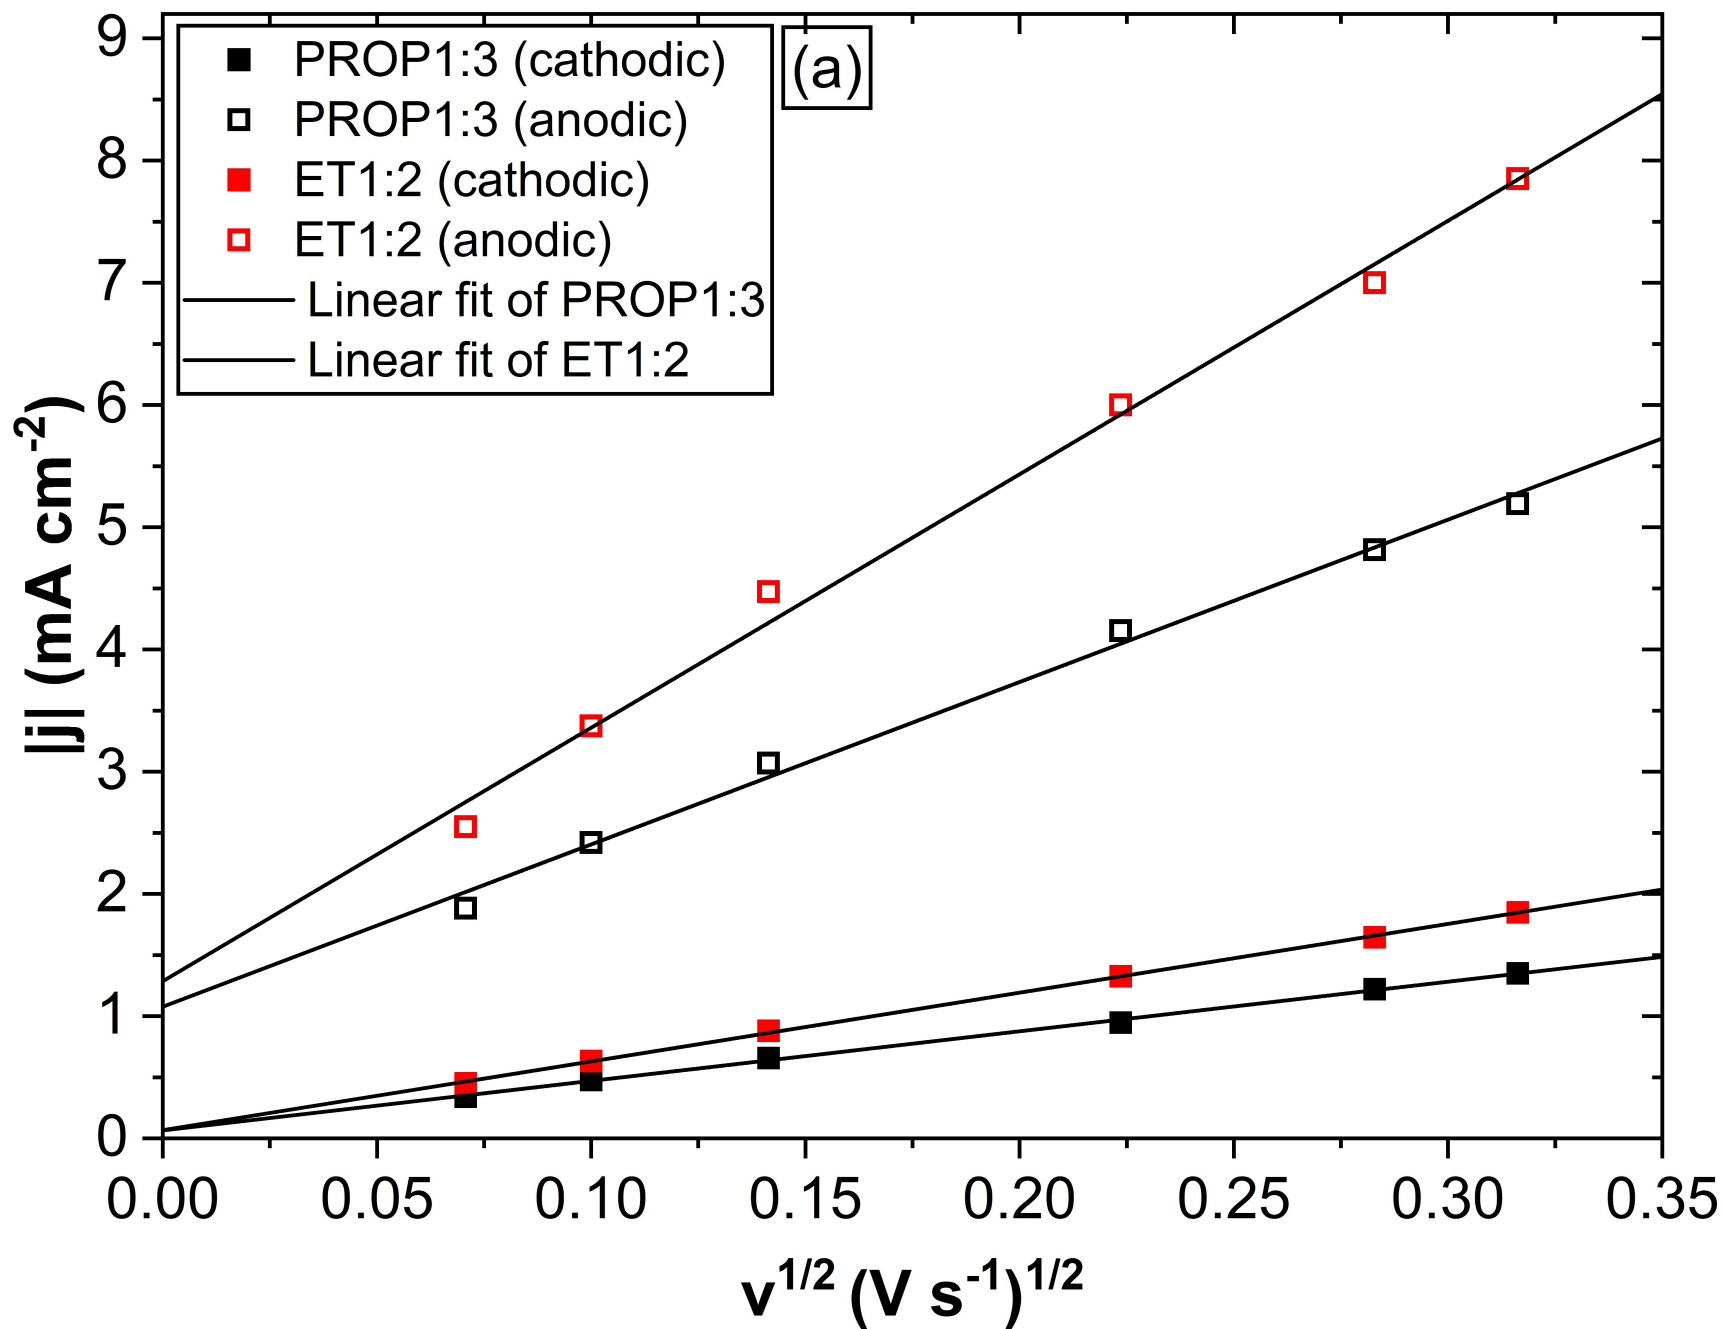

Supplement: d4va00042k3.pdf [file d4va00042k3.pdf]

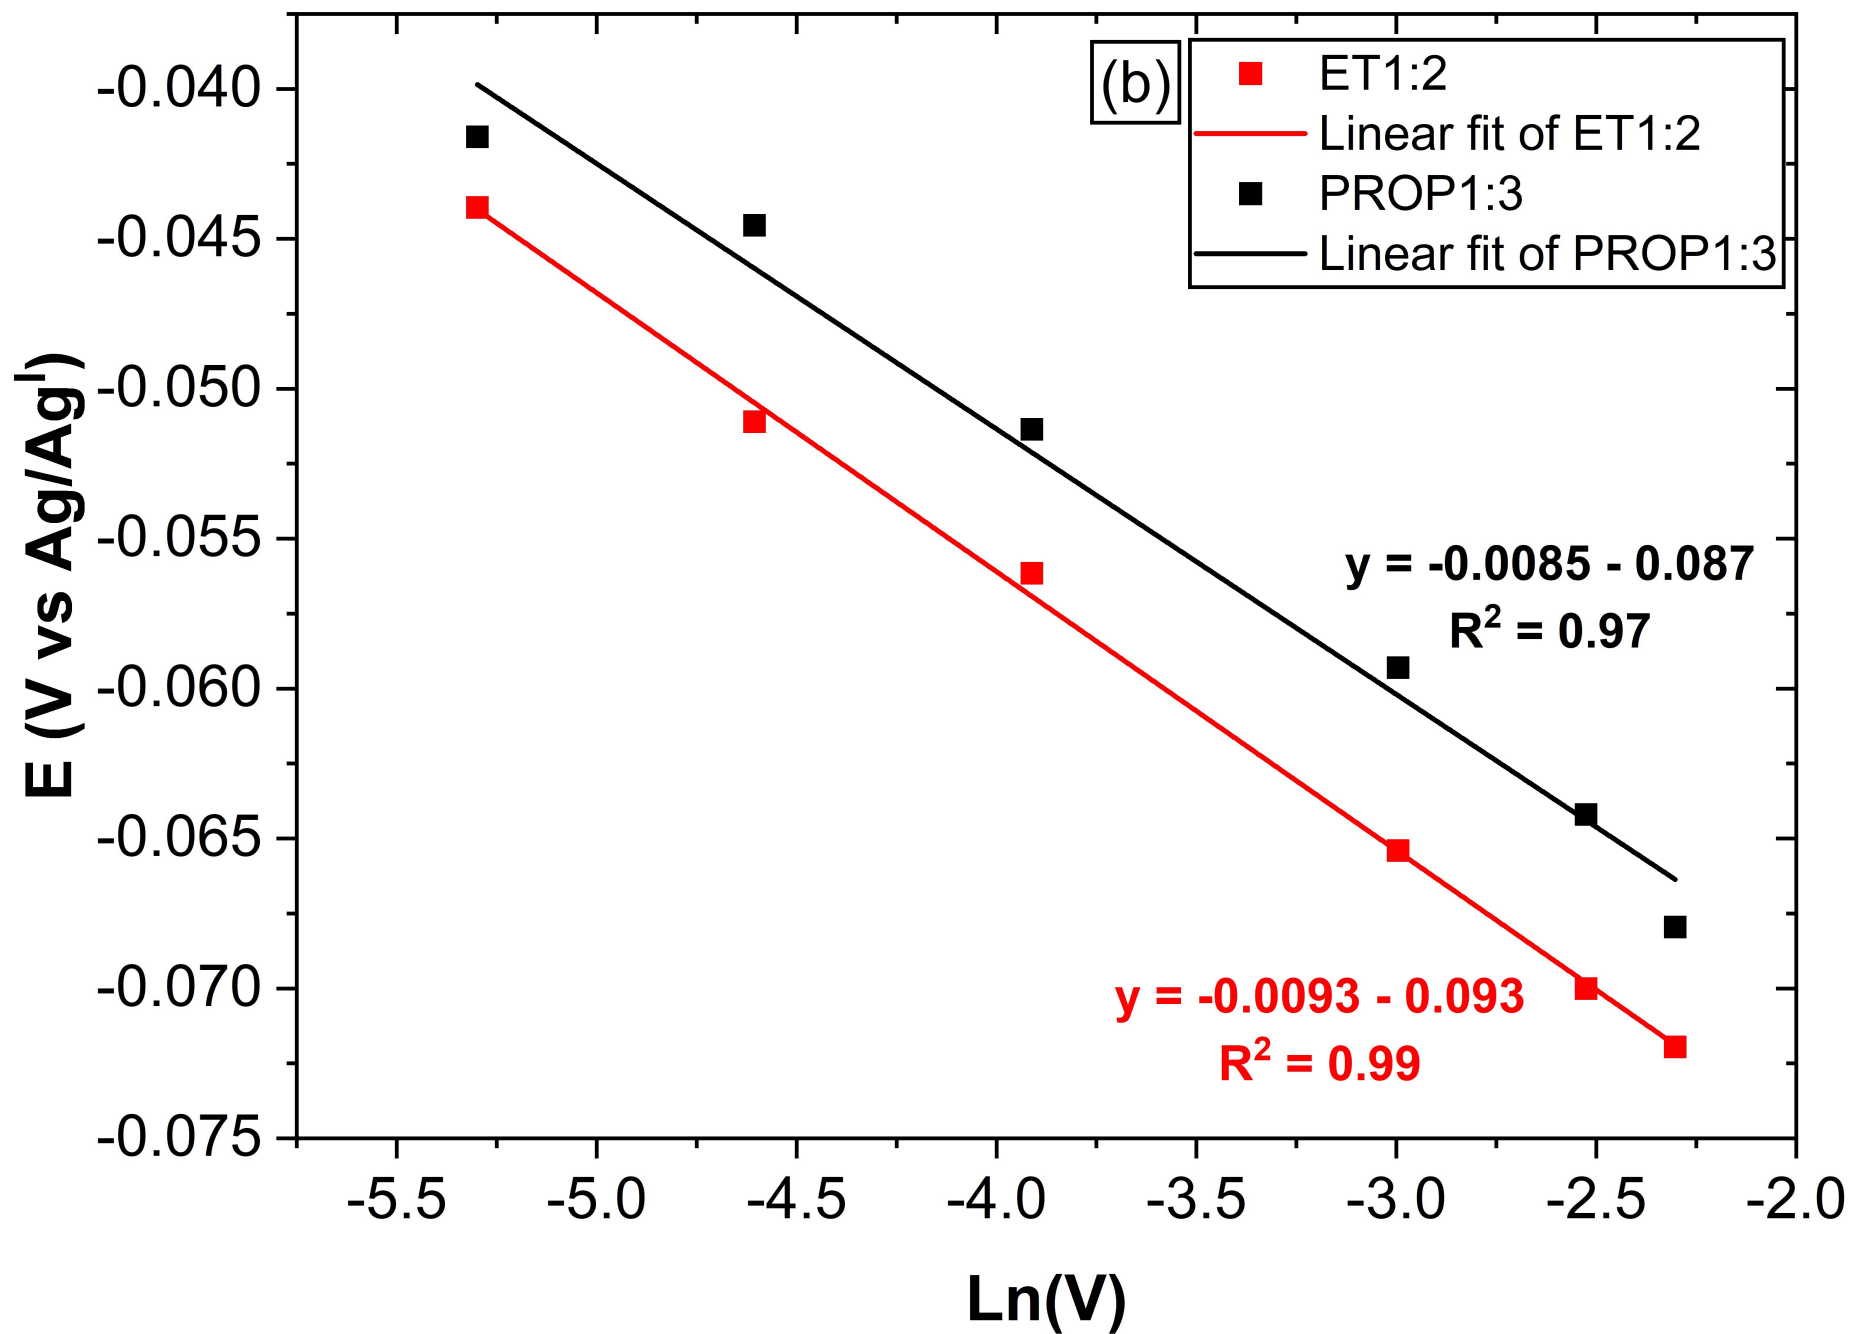

Supplement: d4va00042k4.pdf [file d4va00042k4.pdf]

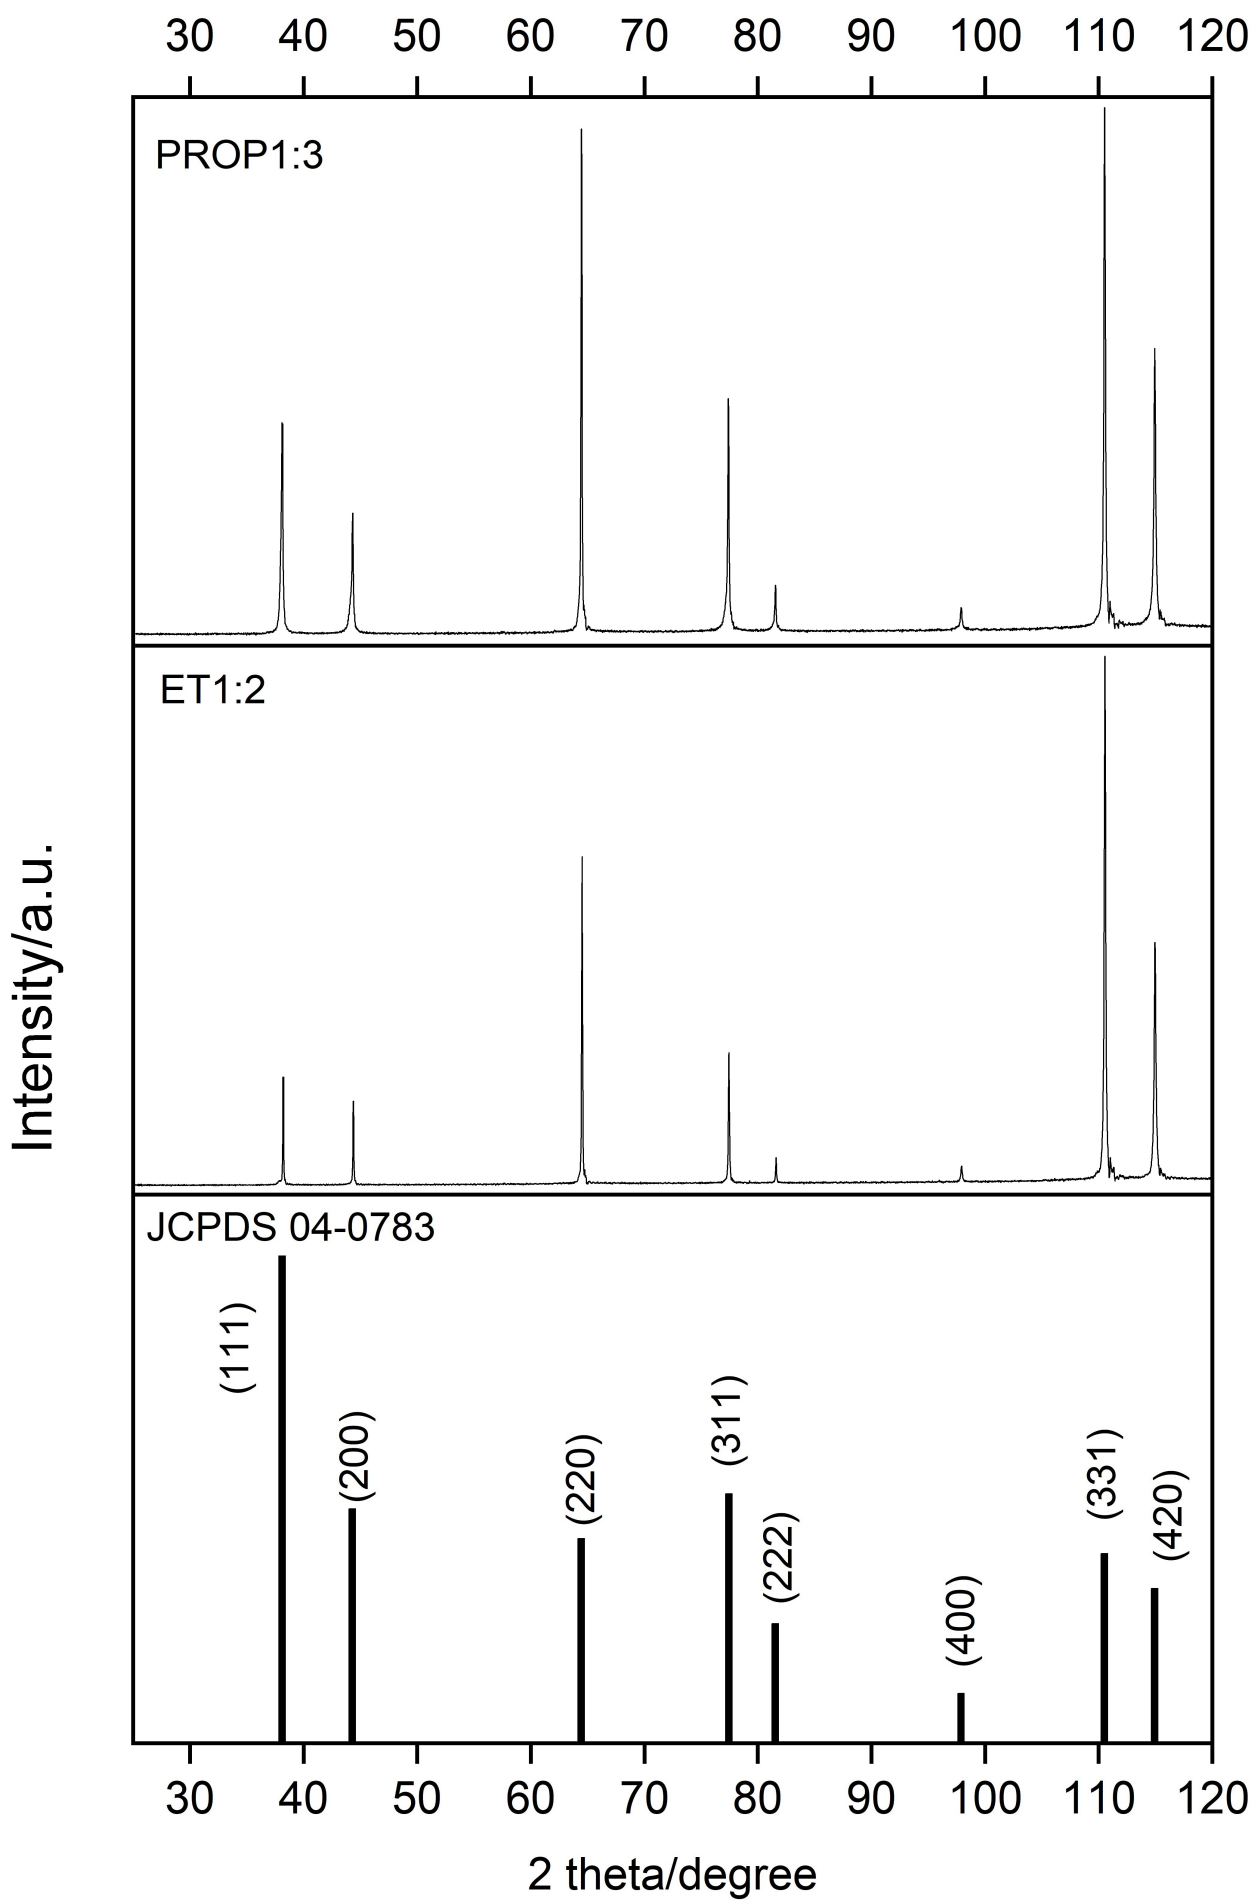

Supplement: d4va00042k5.pdf [file d4va00042k5.pdf]
